# Supplementary material for: Preparation of Temperature-Responsive Antibody–Nanoparticles by RAFT-Mediated Grafting from Polymerization
Source: MDPI journal article supplement (doi:10.3390/polym14214584), 2022-10-28
Supplement: s1 [file s1]

## Supporting Information

# Preparation of Temperature-responsive Antibody-nanoparticles by RAFT mediated Grafting from Polymerization

Erika Yoshihara <sup>1,2</sup>, Ahmed Nabil <sup>1,3,4</sup>, Shinichi Mochizuki <sup>5</sup>, Michihiro Iijima <sup>6</sup> and Mitsuhiro Ebara <sup>1,2,7\*</sup>

<sup>1</sup> Research Center for Functional Materials (RCFM), National Institute for Materials Science (NIMS), 1-1 Namiki, Tsukuba 305-0044, Japan

<sup>2</sup> Graduate School of Pure and Applied Sciences, University of Tsukuba, 1-1-1 Tennodai, Tsukuba 305-8577, Japan

<sup>3</sup> Biotechnology and Life Sciences Department, Faculty of Postgraduate Studies for Advanced Sciences (PSAS), Beni-Suef University, Beni-Suef 62511, Egypt

<sup>4</sup> Egyptian Liver Research Institute and Hospital (ELRIAH), El Mansoura, 35511, Egypt

<sup>5</sup> The University of Kitakyushu Faculty of Environmental Engineering, 1-1 Hibikino, Wakamatsu, Kitakyushu, Japan

<sup>6</sup> Department of Materials Chemistry and Bioengineering, National Institute of Technology, Oyama College (NIT, Oyama College), 771 Nakakuki, Oyama 323-0806, Japan

<sup>7</sup> Graduate School of Industrial Science and Technology, Tokyo University of Science, 1-3 Kagurazaka, Shinjuku, Tokyo 162-0825, Japan

\* E-mail: EBARA.Mitsuhiro@nims.go.jp

## Table of contents:

**Table S1.** Value of each measurement by UV-vis and Fluorescence intensity.

**Figure S1.** UV-vis measurement results of IgG and IgG-CTA in PBS (0.1 mg/mL).

**Figure S2.** The GPC results of the model reaction between CTA and monomer.

**Table S2.** The GPC results of each model reaction between NHS-CTA and monomer.

**Figure S3.** DLS measurement result of IgG-CTA in PBS (0.1 mg/mL).

**Table S3.** Value of each measurement by DLS and Zeta Potential.

**Figure S4.** The thermal precipitation protocol of IgG-PNIPAAm.

Table S1. Value of each measurement by UV-vis and Fluorescence intensity.

|         | Abs. (310 nm/280 nm) * | Fluorescence intensity (495 nm) ** |
|---------|------------------------|------------------------------------|
| IgG     | 0.018                  | 26130                              |
| IgG-CTA | 0.080                  | 25047                              |

\* The absorbance intensity derived from thiocarbonyl group (310 nm) against absorbance derived from protein (280 nm).

\*\* The fluorescence intensity derived from fluorescamine (495 nm) conjugated to unreacted amino residues.

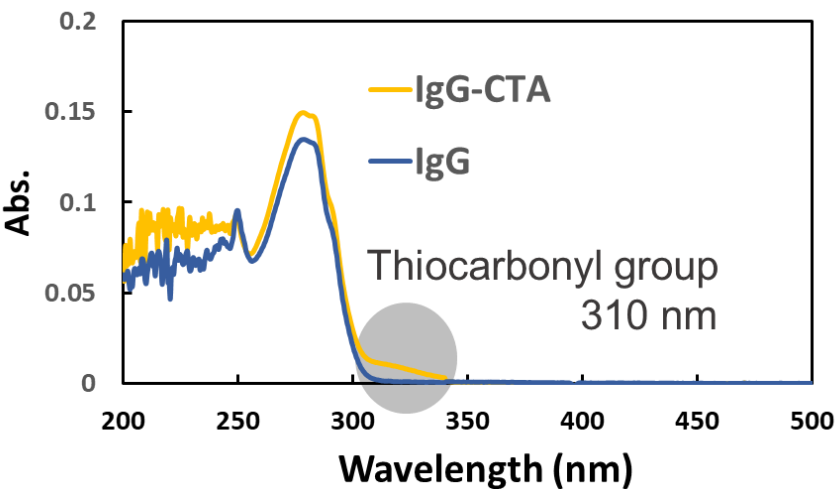

Figure S1. UV-vis measurement results of IgG and IgG-CTA in PBS (0.1 mg/mL).

VA-044

Cyanomethyl  
dodecyl trithiocarbonate

PB (pH 6.0, 0.1 M)  
25°C, 24 h

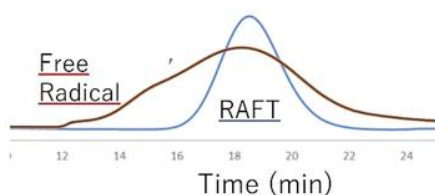

- Free Radical :  $M_n=153,000$  |  $M_w/M_n=2.9$
- RAFT :  $M_n=135,000$   $M_w/M_n=1.2$

Table S2. The GPC results of each model reaction between NHS-CTA and monomer.

| Monomer concentration (mM) | Mn       | Mw/Mn |
|----------------------------|----------|-------|
| 250                        | 1023,000 | 1.8   |
| 400                        | 1118,000 | 1.8   |
| 550                        | 1474,000 | 1.5   |

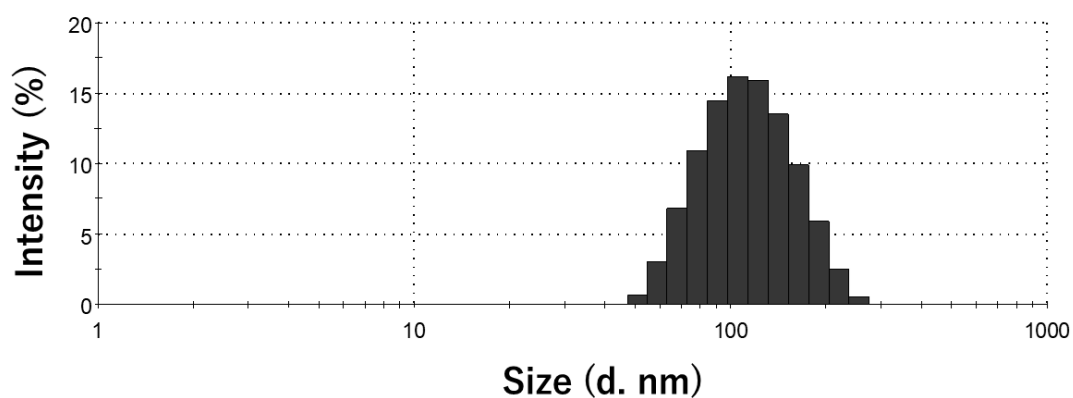

Figure S3. DLS measurement result of IgG-CTA in PBS (0.1 mg/mL).

Table S3. Value of each measurement by DLS and Zeta Potential.

| Sample name | Size (d.nm) | Zeta Potential (mV) |
|-------------|-------------|---------------------|
| IgG         | 10 ± 2.3    | - 6.0               |
| IgG-CTA     | 118 ± 19.5  | - 1.3               |
| IgG-PNIPAAm | 100 ± 53.3  | - 1.1               |

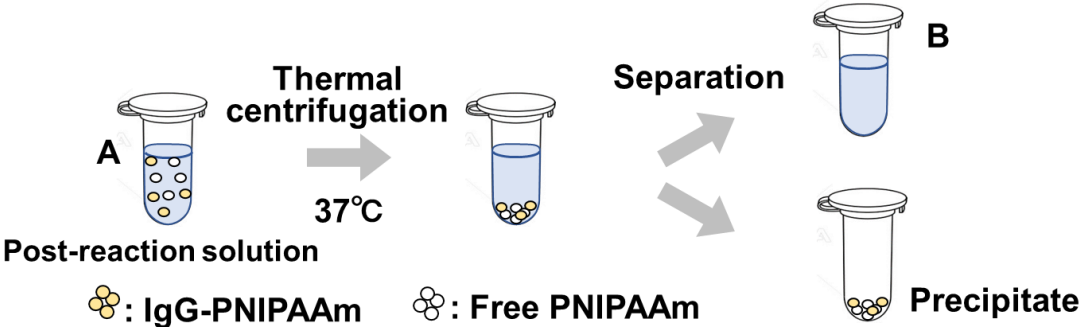

$$\text{IgG recovery ratio (\%)} = \frac{A - B}{A} \times 100$$

Figure S4. The thermal precipitation protocol of IgG-PNIPAAm.
